# Supplementary material for: Inter- and intra-annual wind speed variabilities in wide valley regions of the middle reaches of the Yarlung Tsangpo River, China
Source: PubMed Central journal article supplement (PMC7392765; doi:10.1038/s41598-020-69392-2), 2020-07-29
Supplement: 41598_2020_69392_MOESM1_ESM.pdf [file 41598_2020_69392_MOESM1_ESM.pdf]

## **Supplementary Information**

**Title: Inter- and intra-annual wind speed variabilities in wide valley regions of the middle reaches of the Yarlung Tsangpo River, China**

**Authors: Ben Yue<sup>1</sup>, Mei Yadong<sup>1,\*</sup>, Chen Yiming<sup>2</sup>, Hu Tiesong<sup>1</sup> & Zhu Di<sup>1</sup>**

**Figure S1.** (a) Sen's slope of the Mann-Kendall test and (b) LSLR's slope applied to the time series of monthly wind speed at Tsetang, Lhasa and Nyêmo stations for the periods of 1960–2015, 1960–2015 and 1974–2015, respectively.

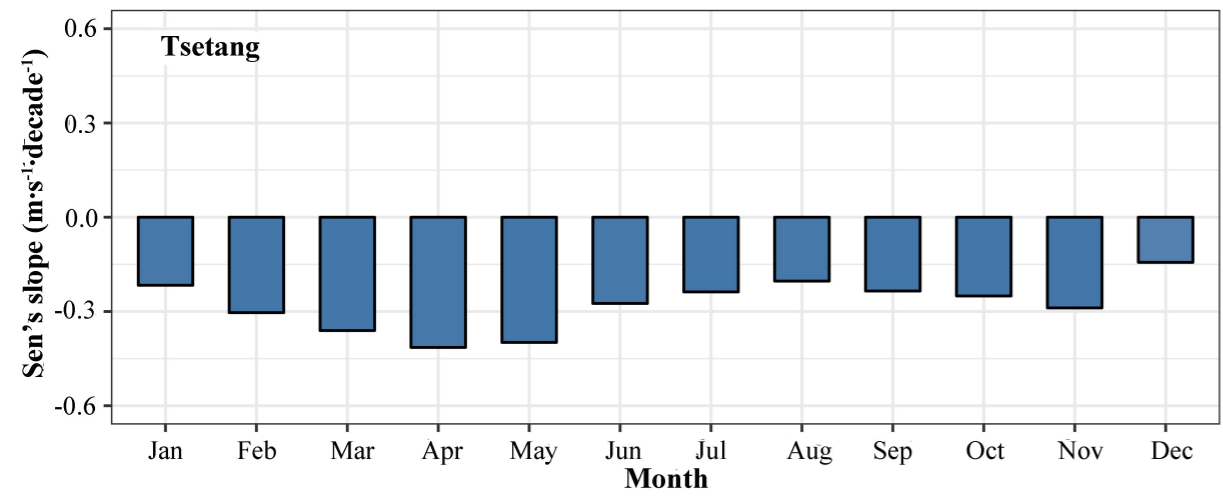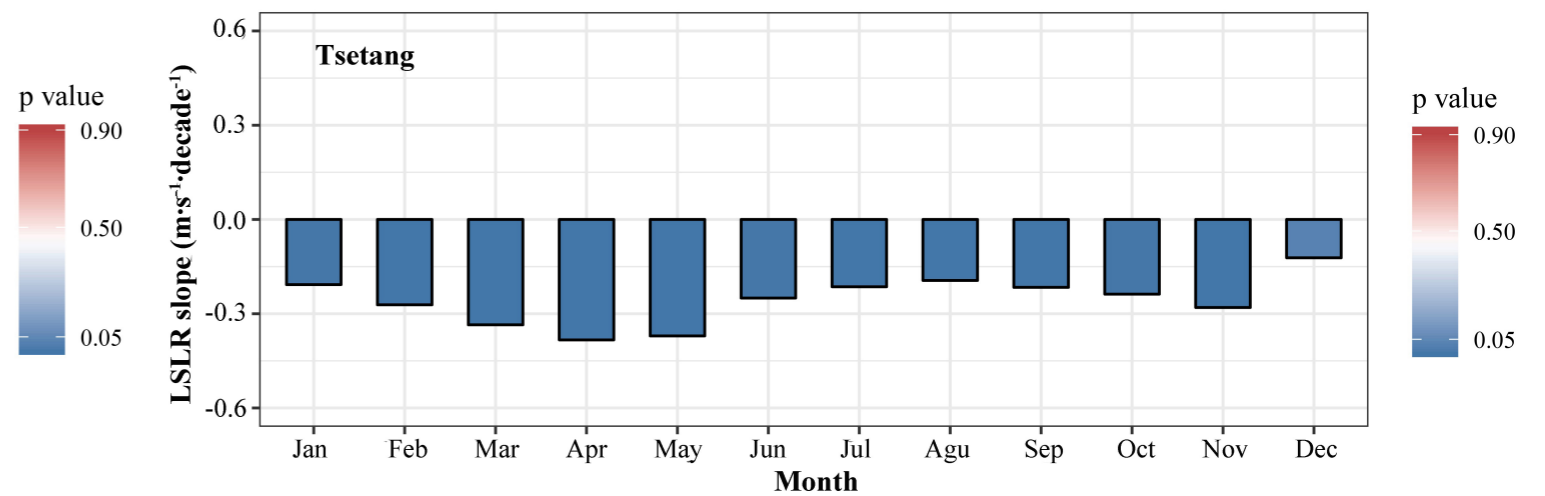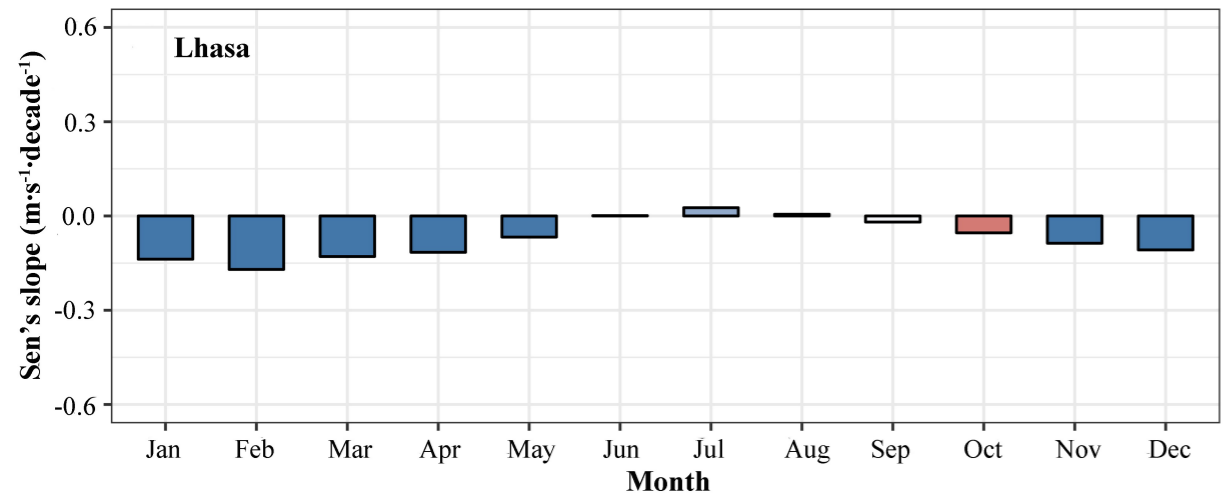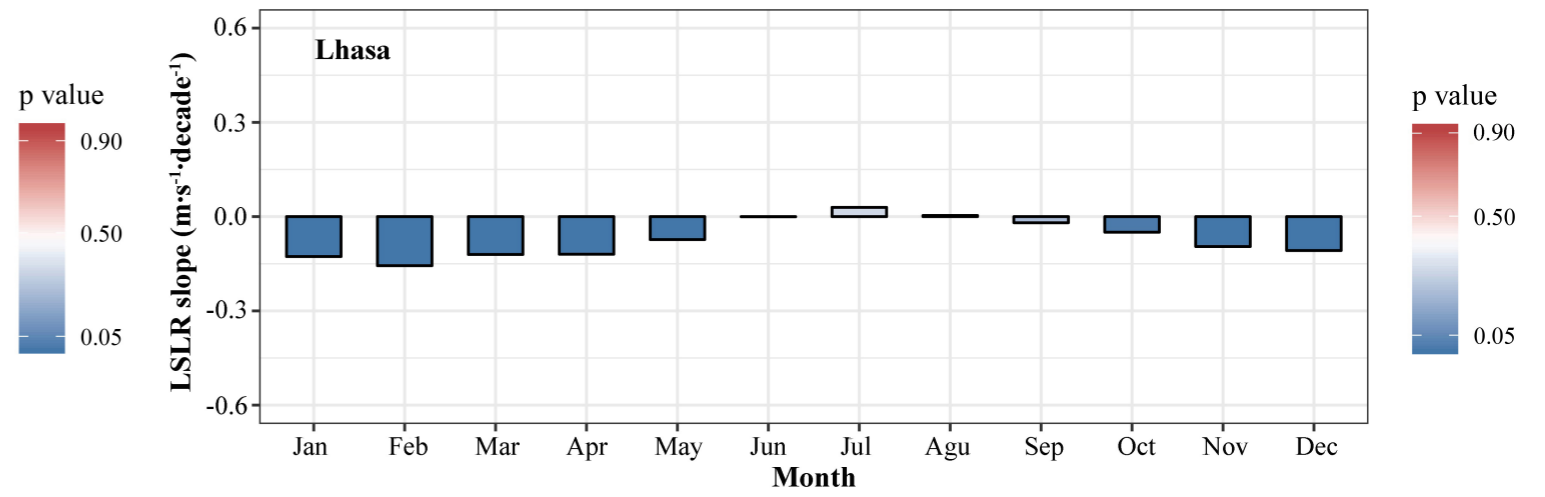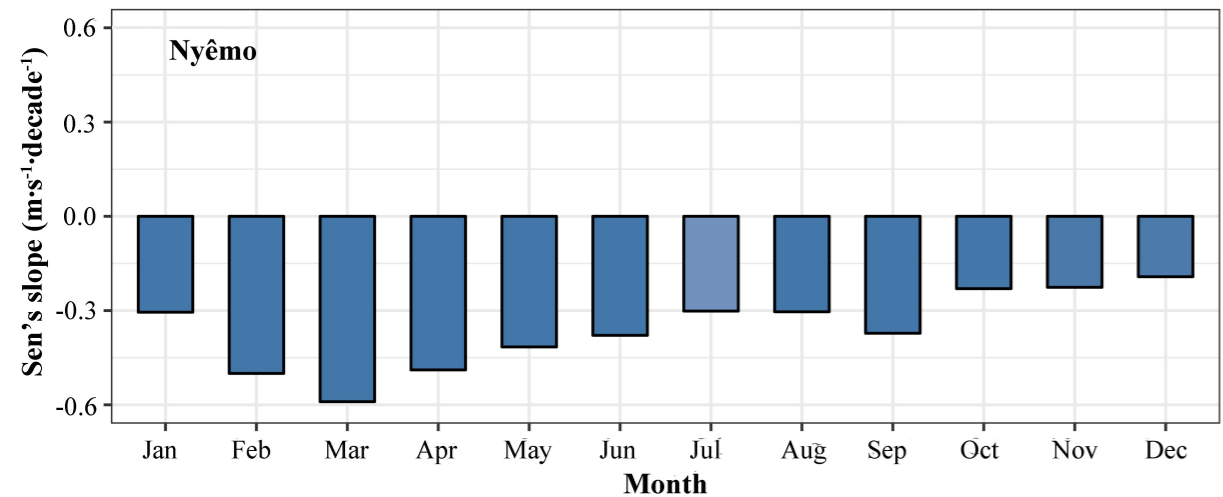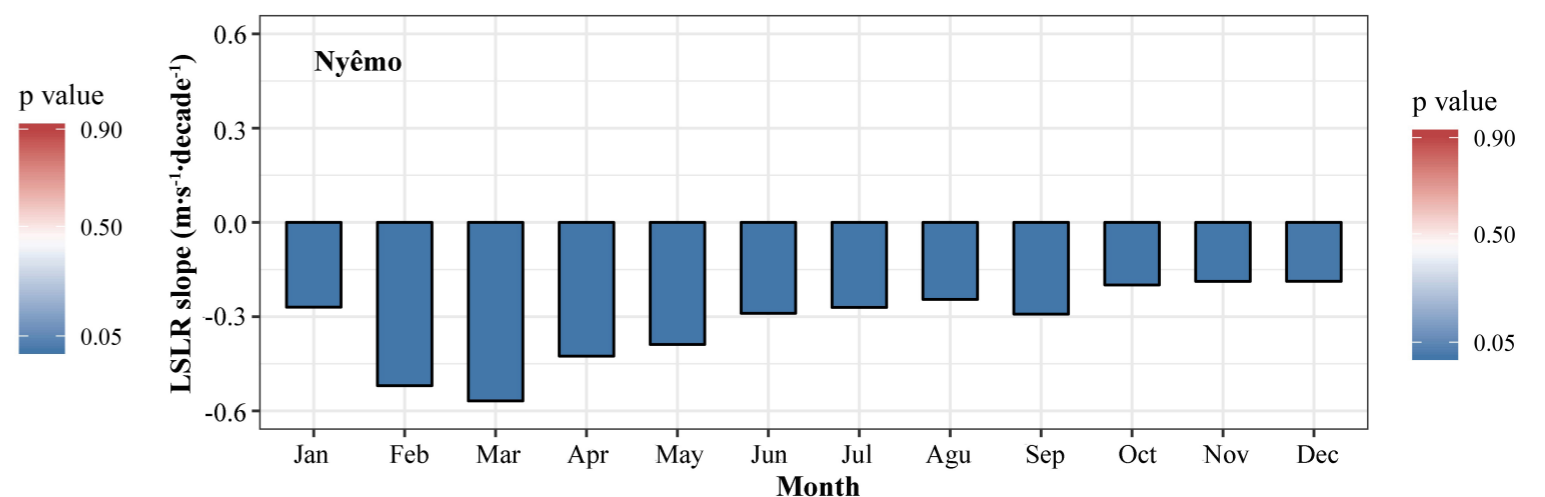

(a) Sen's slope

(b) LSLR's slope

**Table S2.** Spearman correlation coefficients estimated between influence variables in the period 1960-2015. Values in italic & bold and in bold represent the correlation coefficient were statistically significant at 0.01 and 0.05 confidence level, respectively.  $\Delta T_1$  and  $\Delta T_2$  present  $\Delta T_{LL-ML}$  and  $\Delta T_{HL-ML}$ , respectively;  $\Delta P_1$  and  $\Delta P_2$  present  $\Delta P_{LL-ML}$  and  $\Delta P_{HL-ML}$ , respectively. UR is abbreviation of urbanization rate. Values in italic & bold and in bold represent the correlation coefficient were statistically significant at 0.01 and 0.05 confidence level, respectively.

| Variables    | <i>u</i>      | <i>v</i>      | TPM           | <i>T</i>      | $\Delta T_1$  | $\Delta T_2$  | $\Delta P_1$  | $\Delta P_2$  | AO           | NAO    | PDO    | NDVI  | UR    |
|--------------|---------------|---------------|---------------|---------------|---------------|---------------|---------------|---------------|--------------|--------|--------|-------|-------|
| <i>u</i>     | 1.000         |               |               |               |               |               |               |               |              |        |        |       |       |
| <i>v</i>     | 0.150         | 1.000         |               |               |               |               |               |               |              |        |        |       |       |
| TPM          | <b>-0.277</b> | <b>-0.379</b> | 1.000         |               |               |               |               |               |              |        |        |       |       |
| <i>T</i>     | 0.015         | -0.222        | <b>0.515</b>  | 1.000         |               |               |               |               |              |        |        |       |       |
| $\Delta T_1$ | <b>0.576</b>  | <b>0.269</b>  | <b>-0.394</b> | -0.038        | 1.000         |               |               |               |              |        |        |       |       |
| $\Delta T_2$ | <b>-0.304</b> | 0.125         | -0.206        | 0.122         | -0.121        | 1.000         |               |               |              |        |        |       |       |
| $\Delta P_1$ | <b>0.484</b>  | 0.120         | <b>-0.313</b> | <b>-0.605</b> | 0.196         | <b>-0.315</b> | 1.000         |               |              |        |        |       |       |
| $\Delta P_2$ | <b>0.595</b>  | 0.128         | -0.211        | -0.231        | <b>0.398</b>  | <b>-0.510</b> | <b>0.549</b>  | 1.000         |              |        |        |       |       |
| AO           | -0.249        | 0.100         | -0.074        | 0.147         | <b>-0.269</b> | <b>0.634</b>  | -0.110        | <b>-0.420</b> | 1.000        |        |        |       |       |
| NAO          | -0.212        | 0.195         | -0.252        | -0.091        | -0.064        | <b>0.431</b>  | -0.006        | <b>-0.346</b> | <b>0.724</b> | 1.000  |        |       |       |
| PDO          | <b>-0.268</b> | -0.010        | 0.018         | -0.087        | 0.057         | 0.235         | -0.144        | <b>-0.413</b> | -0.144       | 0.149  | 1.000  |       |       |
| NDVI         | 0.056         | -0.244        | 0.358         | <b>0.422</b>  | 0.019         | -0.151        | -0.051        | 0.250         | 0.024        | -0.064 | -0.217 | 1.000 |       |
| UR           | <b>-0.407</b> | <b>-0.367</b> | 0.246         | <b>0.601</b>  | -0.253        | <b>0.376</b>  | <b>-0.694</b> | <b>-0.577</b> | 0.240        | 0.029  | 0.162  | 0.189 | 1.000 |
